# Supplementary material
Source: PubMed Central journal article supplement (PMC5130358)
Supplement: Supplemental_Table_1.pdf [file Supplemental_Table_1.pdf]

Supplemental table 1. Significant differentially expressed genes in ZFP-TG muscle.

| Gene name     | Log2 fold change | p-value     |
|---------------|------------------|-------------|
| Kcns1         | 8.1080178        | 0.000118259 |
| 4933403O08Rik | 7.978907479      | 0.000147222 |
| Spp2          | 5.946672014      | 0.000210009 |
| Btn1a1        | 5.900485943      | 0.000106956 |
| Tex16         | 5.869150102      | 2.26E-11    |
| Iyd           | 5.675009164      | 0.000673202 |
| 1700095J03Rik | 5.414926705      | 4.32E-07    |
| Serpina6      | 5.344517503      | 0.001332103 |
| Stk33         | 5.293012959      | 1.01E-11    |
| Gm10319       | 5.290729959      | 0.001281853 |
| Gm15622       | 5.272903579      | 0.001445866 |
| Anks4b        | 5.241701494      | 0.000990079 |
| St14          | 5.180327184      | 1.07E-12    |
| Rgn           | 5.174140713      | 9.49E-33    |
| Pde6a         | 5.141414935      | 3.94E-11    |
| Acnat2        | 5.106990287      | 0.003000555 |
| Slc17a3       | 5.081651688      | 0.00013143  |
| Smlr1         | 5.01808446       | 0.003157034 |
| Trbc2         | 4.994860928      | 0.002725932 |
| Gm37895       | 4.889058938      | 0.001491024 |
| Nlrp6         | 4.736675856      | 1.16E-06    |
| Mroh6         | 4.726469413      | 2.33E-05    |
| Hsd17b2       | 4.592833962      | 0.000326638 |
| BC089597      | 4.585593615      | 0.00049719  |
| Susd4         | 4.568147561      | 2.24E-32    |
| Gckr          | 4.549338586      | 9.03E-05    |
| Hap1          | 4.530983958      | 2.06E-20    |

|           |             |             |
|-----------|-------------|-------------|
| Slc22a30  | 4.467706848 | 6.22E-05    |
| Acsml     | 4.437772754 | 1.15E-06    |
| Dll1      | 4.424854146 | 3.98E-60    |
| Zfp407    | 4.410190653 | 5.37E-135   |
| Apon      | 4.406959679 | 3.58E-06    |
| Serpina10 | 4.382638081 | 0.000702593 |
| Ces3b     | 4.356399482 | 1.43E-05    |
| Ugt1a1    | 4.349899985 | 0.000810982 |
| Mug-ps1   | 4.316876497 | 1.05E-05    |
| F13b      | 4.302806364 | 1.49E-08    |
| Dnase2b   | 4.241747791 | 0.00089994  |
| Klkb1     | 4.238819694 | 0.001152694 |
| Ugt2a3    | 4.223373118 | 2.61E-08    |
| Entpd8    | 4.2159578   | 0.000692334 |
| Apob      | 4.199943259 | 6.22E-08    |
| C8a       | 4.153756012 | 2.20E-05    |
| Cyp2c69   | 4.153749837 | 0.001203636 |
| Hrg       | 4.146975472 | 2.47E-06    |
| G6pc      | 4.118422816 | 9.88E-07    |
| Pipox     | 4.112487753 | 0.00016069  |
| Cyp2d9    | 4.107679414 | 3.68E-06    |
| Itih1     | 4.106976572 | 4.92E-08    |
| Apol7a    | 4.084235081 | 2.75E-05    |
| Onecut2   | 4.070153573 | 2.23E-05    |
| A1cf      | 4.054065438 | 5.87E-05    |
| Ugt1a9    | 4.052711373 | 4.69E-05    |
| Cps1      | 4.04966367  | 2.44E-07    |
| Pah       | 4.049354005 | 5.06E-07    |
| Mug1      | 4.038089064 | 5.34E-07    |

|         |             |             |
|---------|-------------|-------------|
| F11     | 4.032706894 | 0.000193254 |
| Rab42   | 4.032283942 | 3.48E-05    |
| Ces3a   | 4.028067682 | 1.68E-06    |
| Mia2    | 4.021851873 | 2.34E-05    |
| Ces2a   | 4.020910448 | 3.10E-06    |
| Ighg2c  | 4.011464126 | 0.001631074 |
| Plg     | 3.998838833 | 2.18E-06    |
| Hc      | 3.993120513 | 2.52E-06    |
| Pzp     | 3.991753494 | 1.15E-06    |
| Slco1a1 | 3.979227124 | 1.24E-11    |
| Abcb11  | 3.970305903 | 2.04E-06    |
| Apoa5   | 3.960082377 | 6.01E-07    |
| Hao1    | 3.957589075 | 1.65E-06    |
| Cyp2c37 | 3.938417099 | 5.07E-07    |
| Timd2   | 3.935961746 | 0.002631967 |
| Akr1c6  | 3.91379512  | 8.86E-07    |
| Apoc4   | 3.911599639 | 6.28E-10    |
| Igfbp1  | 3.8952882   | 1.25E-06    |
| Cyp3a25 | 3.889607629 | 4.85E-06    |
| Gm37844 | 3.885604889 | 0.000655566 |
| Cpn1    | 3.880144359 | 0.000286304 |
| Stra6l  | 3.868485998 | 4.19E-05    |
| Ugt2b1  | 3.848120754 | 8.37E-08    |
| Apoa4   | 3.842370252 | 7.71E-07    |
| Acot12  | 3.83665773  | 3.21E-08    |
| Apol9b  | 3.833421068 | 6.26E-05    |
| Aadac   | 3.833115402 | 9.63E-11    |
| Gpr27   | 3.832595599 | 2.46E-42    |
| Cyp2c50 | 3.830949991 | 6.86E-06    |

|               |             |             |
|---------------|-------------|-------------|
| Ugt2b34       | 3.826943938 | 1.61E-06    |
| Gys2          | 3.812756422 | 0.000109566 |
| Cyp4a10       | 3.796883984 | 8.29E-07    |
| Uroc1         | 3.795779488 | 1.15E-05    |
| Cyp2c67       | 3.784554956 | 0.000208629 |
| 9330162012Rik | 3.780744181 | 3.39E-23    |
| Alb           | 3.773352998 | 4.89E-07    |
| Cyp4f14       | 3.76403177  | 3.53E-05    |
| Apof          | 3.762410456 | 7.16E-07    |
| Slc30a10      | 3.76106151  | 0.000156979 |
| Slc27a2       | 3.755008773 | 1.61E-06    |
| Ces1c         | 3.754714755 | 6.51E-07    |
| Pigr          | 3.750073306 | 8.10E-06    |
| Baat          | 3.748938962 | 1.09E-05    |
| Bcl11a        | 3.741390474 | 4.95E-05    |
| 1300017J02Rik | 3.734088555 | 1.79E-06    |
| C8b           | 3.733936254 | 1.78E-05    |
| Skap1         | 3.731495632 | 0.000419816 |
| Tat           | 3.731488273 | 3.64E-06    |
| Gm4788        | 3.722302542 | 2.54E-05    |
| Fgb           | 3.721523885 | 1.00E-06    |
| Mug2          | 3.718570805 | 0.000251655 |
| Mat1a         | 3.712809671 | 5.58E-06    |
| Fga           | 3.703282326 | 9.80E-07    |
| Hsd17b6       | 3.700379232 | 0.001328995 |
| Kng1          | 3.697040456 | 8.31E-06    |
| Afm           | 3.695174149 | 0.000173178 |
| Dpys          | 3.691588256 | 3.62E-07    |
| Ugt3a2        | 3.6879542   | 4.23E-06    |

|           |             |             |
|-----------|-------------|-------------|
| Cyp4a14   | 3.685908592 | 3.25E-06    |
| Serpina1b | 3.685818922 | 6.21E-07    |
| Cml2      | 3.669622506 | 1.42E-05    |
| Cyp3a59   | 3.661343513 | 6.41E-05    |
| Hgd       | 3.659915383 | 1.13E-05    |
| Itih3     | 3.65667548  | 1.87E-05    |
| Abcc2     | 3.656219151 | 7.18E-06    |
| Dmgdh     | 3.652758483 | 0.00025365  |
| Cyp2a12   | 3.649643059 | 4.36E-06    |
| Bhmt      | 3.644947278 | 2.80E-06    |
| Urah      | 3.641209028 | 0.000106121 |
| Fbp1      | 3.620588017 | 3.22E-07    |
| Ugt2b36   | 3.620215826 | 2.95E-06    |
| Fetub     | 3.617716647 | 0.000167479 |
| Ces2e     | 3.617488048 | 6.66E-06    |
| Sult1d1   | 3.613825367 | 8.66E-09    |
| Cyp3a11   | 3.61252474  | 1.25E-07    |
| Itih4     | 3.611298216 | 4.34E-06    |
| Slc27a5   | 3.610699844 | 4.40E-06    |
| Ugt2b35   | 3.599446989 | 0.00026234  |
| Cyp2c54   | 3.596720988 | 0.001031223 |
| Sult2a8   | 3.584315959 | 2.66E-07    |
| Serpina1e | 3.563235978 | 2.87E-06    |
| Cyp7a1    | 3.563153319 | 2.10E-05    |
| Slco1b2   | 3.562387224 | 1.47E-07    |
| Aadat     | 3.558306104 | 6.57E-06    |
| Apoa2     | 3.555945285 | 3.48E-07    |
| Aldh8a1   | 3.54831401  | 5.00E-05    |
| Rdh7      | 3.541024933 | 2.70E-07    |

|           |             |             |
|-----------|-------------|-------------|
| Cyp2j5    | 3.53554646  | 1.67E-05    |
| Azgp1     | 3.525775424 | 2.12E-06    |
| Serpinf2  | 3.517559762 | 4.62E-06    |
| Cyp4a12b  | 3.517013185 | 0.000549339 |
| Asgr1     | 3.512041799 | 2.15E-07    |
| Apoa1     | 3.508191579 | 7.65E-07    |
| Mbl1      | 3.503416949 | 1.79E-05    |
| Aldob     | 3.502378374 | 2.06E-06    |
| F12       | 3.490051395 | 7.30E-05    |
| Slc22a1   | 3.481772194 | 4.09E-05    |
| Uox       | 3.479032391 | 1.24E-06    |
| Abcc6     | 3.476596124 | 0.00011123  |
| Cfhr2     | 3.471356037 | 6.37E-09    |
| Hamp      | 3.461209369 | 1.30E-05    |
| Ces1g     | 3.459472924 | 4.35E-05    |
| Ahsg      | 3.449849453 | 1.88E-06    |
| Cyp2c40   | 3.448906801 | 0.000261193 |
| Serpina1d | 3.441473806 | 1.34E-05    |
| Slc17a2   | 3.440562784 | 0.000193621 |
| Cyp2c29   | 3.436131072 | 5.34E-06    |
| Gc        | 3.414316624 | 2.50E-06    |
| Ttr       | 3.414312907 | 2.58E-05    |
| F9        | 3.413859023 | 8.96E-05    |
| C4bp      | 3.408436612 | 1.87E-05    |
| Slc2a2    | 3.407926303 | 0.000155442 |
| Hnf4a     | 3.407502361 | 8.51E-05    |
| Cyp2d26   | 3.403468811 | 1.34E-05    |
| Arg1      | 3.401936094 | 3.67E-07    |
| Ttpa      | 3.39847292  | 3.17E-07    |

|               |             |             |
|---------------|-------------|-------------|
| Serpina3k     | 3.36761876  | 5.53E-07    |
| Tmem150c      | 3.360083283 | 3.34E-25    |
| F2            | 3.357958845 | 6.47E-06    |
| Mup3          | 3.348706393 | 6.84E-08    |
| Cyp8b1        | 3.335692617 | 2.04E-05    |
| Cyp3a13       | 3.334554799 | 2.12E-05    |
| Map3k15       | 3.326395957 | 2.08E-29    |
| Etnppl        | 3.320562984 | 2.38E-05    |
| Hpd           | 3.320095738 | 8.22E-06    |
| C9            | 3.290570045 | 5.90E-05    |
| Mbl2          | 3.28632474  | 5.26E-06    |
| Serpinc1      | 3.284310785 | 5.16E-06    |
| Tmem28        | 3.278195419 | 1.94E-06    |
| Cyp2c68       | 3.278138499 | 2.47E-06    |
| Mettl7b       | 3.276952642 | 0.000343232 |
| B430119L08Rik | 3.2689159   | 5.46E-05    |
| Chd3os        | 3.267049714 | 7.80E-05    |
| Xylb          | 3.265329128 | 5.47E-05    |
| Cd8b1         | 3.264594137 | 0.000227498 |
| Cfi           | 3.258712013 | 1.04E-05    |
| Kynu          | 3.255396538 | 2.67E-05    |
| Otc           | 3.254663164 | 0.000128708 |
| Elovl2        | 3.254653052 | 2.91E-05    |
| Clec4f        | 3.250503327 | 0.000579731 |
| Igf2os        | 3.250373545 | 1.52E-07    |
| Serpina1c     | 3.24651008  | 0.000107535 |
| Hpx           | 3.231560449 | 1.37E-06    |
| F5            | 3.2168285   | 5.94E-05    |
| Fgg           | 3.216819171 | 7.56E-06    |

|          |             |             |
|----------|-------------|-------------|
| Mup1     | 3.216335333 | 2.15E-05    |
| Nr1i3    | 3.202729068 | 0.00052812  |
| Sgk2     | 3.199606845 | 0.002382897 |
| Akr1c20  | 3.195766988 | 0.001421198 |
| Apoh     | 3.192037875 | 1.15E-05    |
| Aass     | 3.182922306 | 4.15E-05    |
| Gm4952   | 3.17761018  | 0.00076184  |
| Ugt2b5   | 3.168550756 | 6.19E-08    |
| Cd5l     | 3.161355705 | 9.02E-06    |
| Fabp1    | 3.152833709 | 3.25E-06    |
| Glde     | 3.145030894 | 0.000218554 |
| Cyp4a32  | 3.14457654  | 0.000234982 |
| Cyp2c70  | 3.140153156 | 2.41E-05    |
| Cyp1a2   | 3.140138381 | 1.20E-05    |
| Prim1    | 3.1285217   | 2.36E-22    |
| Bcl11b   | 3.125010579 | 0.001126645 |
| Agxt     | 3.122299814 | 3.09E-05    |
| Amdhd1   | 3.121493202 | 6.22E-06    |
| Akr1d1   | 3.107188387 | 4.45E-06    |
| Adh4     | 3.096471736 | 0.000110987 |
| Gm20036  | 3.093706991 | 1.10E-08    |
| Slc1a2   | 3.086469703 | 0.000115588 |
| Hal      | 3.080432368 | 8.11E-05    |
| Gp5      | 3.075145995 | 0.000191219 |
| Aqp9     | 3.062502393 | 0.000217698 |
| AI182371 | 3.056865791 | 3.19E-06    |
| Ftcd     | 3.055586859 | 0.001046439 |
| Bbox1    | 3.042092562 | 1.16E-06    |
| Dnajc22  | 3.040493382 | 0.001260366 |



|               |             |             |
|---------------|-------------|-------------|
| 1-Mar         | 3.04011777  | 1.86E-05    |
| Ass1          | 3.036924489 | 2.47E-05    |
| Fbxo2         | 3.026093858 | 0.000644484 |
| Tm4sf4        | 3.02576889  | 0.002058924 |
| Dsp           | 3.014876234 | 2.34E-05    |
| Cpn2          | 3.012374233 | 0.00019387  |
| Etnk2         | 3.010084546 | 1.00E-05    |
| Trim38        | 3.009781618 | 0.000155237 |
| Hsd3b3        | 3.005842815 | 0.000107269 |
| Dio1          | 3.004674073 | 7.23E-05    |
| RP24-140D11.1 | 2.995820847 | 6.23E-07    |
| Cyp4a12a      | 2.994759315 | 0.002000049 |
| Gm26834       | 2.993579912 | 0.000687236 |
| Abcg8         | 2.982232788 | 0.000580131 |
| 1700040L02Rik | 2.966739673 | 1.76E-06    |
| Cpb2          | 2.965264232 | 0.002058049 |
| Hsd17b13      | 2.957864477 | 6.84E-05    |
| Mup20         | 2.946560584 | 1.07E-06    |
| Mup21         | 2.943577089 | 0.002973368 |
| Fgl1          | 2.932135726 | 2.68E-07    |
| Hao           | 2.931984665 | 1.03E-06    |
| Tfr2          | 2.925081767 | 6.76E-06    |
| Rbp4          | 2.917274307 | 1.89E-05    |
| Igsf11        | 2.914679692 | 1.99E-10    |
| 9530080O11Rik | 2.910840151 | 4.68E-10    |
| Slamf6        | 2.909030748 | 0.000549332 |
| Tdo2          | 2.90243225  | 6.34E-06    |
| Acox2         | 2.897800505 | 2.24E-07    |
| Tnfrsf11b     | 2.878086915 | 6.01E-09    |

|         |             |             |
|---------|-------------|-------------|
| Cyp17a1 | 2.877776334 | 0.001868828 |
| Abcg5   | 2.870882428 | 0.001254942 |
| Mss51   | 2.86934534  | 0.001264725 |
| Apoc2   | 2.856667184 | 2.38E-05    |
| Rnf43   | 2.854081941 | 0.000367912 |
| Ambp    | 2.841590806 | 5.08E-05    |
| Gls2    | 2.840261991 | 7.27E-06    |
| Itih2   | 2.833772046 | 9.38E-05    |
| P2ry10  | 2.827865961 | 0.000439042 |
| Lcat    | 2.80509784  | 0.001852533 |
| Slc2a3  | 2.801762539 | 2.00E-25    |
| Cyp2d10 | 2.799601063 | 0.000519769 |
| Nr1i2   | 2.78965462  | 0.001497502 |
| Nr1h4   | 2.785677706 | 2.62E-05    |
| Crp     | 2.780775282 | 3.10E-06    |
| Gulo    | 2.780172636 | 0.000149885 |
| Ces1b   | 2.778090734 | 0.001343643 |
| Saa4    | 2.776733793 | 5.02E-05    |
| Sds     | 2.768452709 | 0.000518519 |
| Mup14   | 2.754727637 | 0.001818084 |
| Lipc    | 2.746030229 | 0.000800836 |
| Nlrp4g  | 2.745403207 | 0.000376788 |
| Igfbp2  | 2.741288104 | 1.21E-06    |
| Mup7    | 2.732776677 | 0.000171965 |
| Cyp4a31 | 2.731606362 | 0.000988318 |
| Adrb1   | 2.722473406 | 5.74E-05    |
| Fam83c  | 2.717560578 | 0.000173223 |
| Pglyrp2 | 2.704052445 | 0.000217953 |
| Wwc1    | 2.696307616 | 0.002940251 |

|               |             |             |
|---------------|-------------|-------------|
| Dlgap1        | 2.688581831 | 2.60E-08    |
| Pkdrej        | 2.687578655 | 2.52E-13    |
| Acaa1b        | 2.683989603 | 0.000451011 |
| Akr1c19       | 2.683070169 | 0.002235537 |
| Slc10a5       | 2.67740497  | 0.001919645 |
| Rgs1          | 2.665540923 | 0.002779722 |
| Mgam          | 2.664416733 | 2.78E-05    |
| Glyat         | 2.659292544 | 1.51E-05    |
| RP23-50I16.2  | 2.651530266 | 3.55E-10    |
| BC025446      | 2.651518385 | 0.000749514 |
| Creb3l3       | 2.647827286 | 3.91E-05    |
| Tgtp2         | 2.635314619 | 3.65E-05    |
| Gnmt          | 2.627872024 | 8.05E-05    |
| Ephx4         | 2.627464265 | 2.55E-07    |
| Faah          | 2.617617352 | 0.000138202 |
| RP23-446B17.3 | 2.613176395 | 0.001958422 |
| Tmprss6       | 2.602210071 | 2.67E-05    |
| Cyp4f15       | 2.601362919 | 0.001278012 |
| Slitrk5       | 2.588278538 | 7.88E-07    |
| Glyctk        | 2.587373006 | 0.002605021 |
| Kng2          | 2.563874005 | 7.57E-05    |
| Serpina3m     | 2.556897706 | 0.002062426 |
| Ttc36         | 2.548106742 | 0.000159151 |
| Klhdc8a       | 2.546060858 | 5.85E-05    |
| Apol9a        | 2.526952103 | 0.001374452 |
| Cfhr1         | 2.516902044 | 6.48E-05    |
| Dsg2          | 2.513810706 | 5.92E-05    |
| F10           | 2.50395348  | 0.001427525 |
| Prodh2        | 2.473001542 | 0.002539744 |

|            |             |             |
|------------|-------------|-------------|
| Apoc3      | 2.470702233 | 0.000258709 |
| Zap70      | 2.468396395 | 3.97E-08    |
| Dnase1l3   | 2.466366842 | 3.74E-05    |
| Kif26b     | 2.453559763 | 1.31E-11    |
| Slc37a1    | 2.453180167 | 2.00E-19    |
| Mal2       | 2.435615342 | 0.002553228 |
| Rapgef4os3 | 2.426967321 | 0.001986919 |
| Gm9812     | 2.417867895 | 1.97E-05    |
| Cyp7b1     | 2.406184933 | 0.000104107 |
| Acnat1     | 2.402112152 | 0.003180712 |
| Ankrd13b   | 2.378510412 | 5.96E-19    |
| Mroh8      | 2.373612273 | 1.40E-07    |
| Irx2       | 2.360273136 | 0.002938094 |
| Aspdh      | 2.344897413 | 0.001625376 |
| Klf14      | 2.330366939 | 0.000217558 |
| Abcc3      | 2.296006153 | 3.58E-05    |
| Jph4       | 2.292888501 | 0.000316843 |
| Pon1       | 2.261396609 | 0.002170449 |
| H2-Q10     | 2.254524537 | 0.000277557 |
| Gm4955     | 2.250263    | 0.000342884 |
| Gm2564     | 2.250192117 | 0.001353539 |
| Aspg       | 2.247133438 | 0.000327354 |
| Slc25a13   | 2.223652571 | 0.000563397 |
| Upp2       | 2.222452085 | 0.00119115  |
| B4galnt1   | 2.217172267 | 3.47E-06    |
| Proz       | 2.215741496 | 0.00016402  |
| Fam69b     | 2.215305942 | 8.17E-08    |
| Ccne1      | 2.21482111  | 1.19E-06    |
| Dsc2       | 2.204401992 | 0.000939657 |

|               |             |             |
|---------------|-------------|-------------|
| Kmo           | 2.201845589 | 9.34E-07    |
| Cited1        | 2.182299107 | 0.000775223 |
| Sec14l4       | 2.17842396  | 0.0005942   |
| Mpped2        | 2.162877407 | 1.41E-15    |
| Gm15915       | 2.159018776 | 5.78E-06    |
| 2210011C24Rik | 2.138421382 | 2.23E-12    |
| Rasgrp1       | 2.13431453  | 0.001957645 |
| Reep6         | 2.115084557 | 0.000235748 |
| Serpind1      | 2.107869774 | 0.001686816 |
| Rhoh          | 2.105805631 | 0.000119761 |
| Cd4           | 2.097386455 | 0.000440586 |
| Mup11         | 2.097219894 | 0.000141517 |
| Ak4           | 2.093464774 | 3.55E-24    |
| Dna2          | 2.083837742 | 4.19E-13    |
| Gm6981        | 2.080994339 | 1.83E-05    |
| Rasal3        | 2.064190814 | 0.001151873 |
| Acsm5         | 2.052281441 | 0.001557921 |
| Hmgcs2        | 2.049740063 | 0.000287155 |
| Rims4         | 2.048461386 | 1.24E-09    |
| Col11a2       | 2.045866186 | 0.000217227 |
| Gm32391       | 2.028853724 | 0.000524879 |
| C6            | 2.024720128 | 3.10E-05    |
| D630024D03Rik | 2.024270807 | 3.72E-05    |
| Kctd17        | 2.019787944 | 7.63E-15    |
| Il2rb         | 2.011907968 | 0.000840544 |
| Ms4a4c        | 2.008181289 | 0.001907115 |
| Mup10         | 2.005809996 | 0.001683707 |
| RP23-348H21.2 | 2.002068646 | 0.000884293 |
| Upb1          | 1.996728465 | 0.000225007 |

|               |             |             |
|---------------|-------------|-------------|
| Fgr           | 1.98648272  | 0.000393628 |
| 1700016C15Rik | 1.975152043 | 0.000951245 |
| Sardh         | 1.961549801 | 0.001747983 |
| Mst1          | 1.950588215 | 0.001345489 |
| Sec14l2       | 1.933761902 | 9.66E-05    |
| Dhcr24        | 1.929321875 | 8.12E-05    |
| Hs6st2        | 1.927754711 | 1.51E-36    |
| Slco1a4       | 1.92511993  | 0.000195331 |
| Slc25a47      | 1.923956674 | 4.64E-06    |
| BC094916      | 1.920272665 | 0.001121424 |
| Hgfac         | 1.915268986 | 0.002438407 |
| Cbs           | 1.867933861 | 0.000900047 |
| Zbp1          | 1.866635866 | 5.41E-06    |
| Angptl3       | 1.864777703 | 1.30E-05    |
| Grin2d        | 1.864333804 | 0.001310287 |
| Ppm1e         | 1.859503793 | 4.79E-16    |
| Ppp1r3b       | 1.859300054 | 0.000455148 |
| Gspt2         | 1.855445891 | 1.51E-08    |
| Eda           | 1.850512751 | 2.50E-16    |
| Cd52          | 1.835282866 | 0.000766605 |
| Ehhadh        | 1.830301798 | 9.53E-05    |
| Rab38         | 1.827349742 | 8.28E-05    |
| Nipsnap1      | 1.823925927 | 0.000223018 |
| H2-Q7         | 1.820496003 | 7.16E-09    |
| Tnfrsf13b     | 1.819288966 | 0.00032313  |
| Pydc4         | 1.810512209 | 1.99E-07    |
| Ankrd13d      | 1.809783021 | 3.82E-05    |
| Cish          | 1.808277644 | 2.40E-07    |
| Itgax         | 1.806945468 | 0.000362209 |

|               |             |             |
|---------------|-------------|-------------|
| Cth           | 1.803940491 | 0.001153518 |
| Spn           | 1.797804864 | 0.000498773 |
| Prr15         | 1.793792117 | 8.13E-05    |
| Gm32569       | 1.78486095  | 2.38E-05    |
| Pm20d1        | 1.78107897  | 0.000614534 |
| Nab2          | 1.780726511 | 1.58E-16    |
| Ankrd35       | 1.770610586 | 6.23E-11    |
| Neto2         | 1.763989019 | 2.51E-10    |
| Nim1k         | 1.763438738 | 1.49E-20    |
| Irf7          | 1.750383334 | 1.65E-12    |
| Tlr9          | 1.749719777 | 6.69E-07    |
| Adamts8       | 1.744512804 | 4.15E-06    |
| BC055324      | 1.743663461 | 9.25E-07    |
| Mt3           | 1.73380529  | 3.08E-05    |
| Ddah1         | 1.730527262 | 3.35E-07    |
| Edn3          | 1.724069366 | 3.13E-09    |
| Slfn1         | 1.721566154 | 8.71E-05    |
| Calcr         | 1.708511389 | 8.89E-19    |
| Myf5          | 1.702386729 | 2.51E-12    |
| Apoc1         | 1.701989522 | 0.001654744 |
| Prss8         | 1.701886863 | 0.001369949 |
| Syt14         | 1.691964127 | 0.000178912 |
| A930024N18Rik | 1.691060675 | 0.000327178 |
| Oas1a         | 1.678358732 | 0.000176239 |
| Msra          | 1.677815118 | 2.36E-21    |
| H2-Q6         | 1.677349243 | 8.74E-07    |
| Itgal         | 1.671433219 | 0.000216757 |
| Rogdi         | 1.670407007 | 5.78E-12    |
| Ccdc18        | 1.666058082 | 6.25E-05    |

|               |             |             |
|---------------|-------------|-------------|
| Sash3         | 1.662128633 | 0.000621566 |
| Nxpe3         | 1.661830396 | 2.98E-07    |
| Ccl21a        | 1.660911073 | 0.001977056 |
| Ifi47         | 1.632006303 | 8.77E-07    |
| Nlrc5         | 1.631890118 | 9.35E-07    |
| Fgf11         | 1.625471294 | 2.91E-13    |
| Nppc          | 1.598794801 | 0.002689658 |
| Frmpd1        | 1.586142862 | 5.34E-06    |
| Tmem41a       | 1.582236648 | 9.83E-08    |
| Clcf1         | 1.577795835 | 5.45E-05    |
| Ttc39c        | 1.572762796 | 1.94E-05    |
| Tmem30b       | 1.57222941  | 0.001573271 |
| Oas2          | 1.569946355 | 5.51E-10    |
| Mms22l        | 1.56822112  | 5.39E-06    |
| 0610005C13Rik | 1.567640695 | 0.001808652 |
| Panx1         | 1.56651911  | 5.51E-08    |
| Ptk7          | 1.558849478 | 7.67E-08    |
| Gm37685       | 1.558612467 | 0.000397288 |
| Dpyd          | 1.555691932 | 1.22E-06    |
| Clcn2         | 1.554516243 | 5.88E-11    |
| Zfp711        | 1.551730626 | 8.20E-06    |
| C8g           | 1.548252116 | 0.002748818 |
| Vcpkmt        | 1.545384176 | 1.81E-08    |
| Ryr3          | 1.536704724 | 9.20E-06    |
| Arhgap4       | 1.523499498 | 0.000189116 |
| Uts2r         | 1.519765941 | 0.001552943 |
| Isoc2b        | 1.511700395 | 2.33E-08    |
| Gm37403       | 1.511326542 | 3.46E-07    |
| Pafah1b3      | 1.509333178 | 0.002837165 |



|               |             |             |
|---------------|-------------|-------------|
| Scx           | 1.502389365 | 0.000814101 |
| Cib1          | 1.486496627 | 1.02E-13    |
| Gm166         | 1.486310598 | 0.000461163 |
| Lair1         | 1.482676493 | 8.18E-05    |
| Cmtm8         | 1.479816908 | 9.29E-07    |
| Myd88         | 1.460496367 | 6.90E-13    |
| Fam19a5       | 1.451443571 | 4.62E-07    |
| Tagap         | 1.450167682 | 0.000458383 |
| Tmem107       | 1.446245047 | 0.002920014 |
| Dhx58         | 1.445896088 | 5.51E-06    |
| Nek2          | 1.445062328 | 3.36E-05    |
| Pyhin1        | 1.444740777 | 0.001328542 |
| Fads1         | 1.433970017 | 3.43E-13    |
| Exoc314       | 1.433934515 | 9.04E-05    |
| Marveld2      | 1.433023898 | 0.000371809 |
| Ptpn6         | 1.429914524 | 0.000512314 |
| Tmem82        | 1.428137723 | 3.35E-06    |
| Igtp          | 1.425658221 | 0.000176466 |
| Sdf2l1        | 1.419580243 | 4.89E-06    |
| Fancd2        | 1.417732981 | 5.69E-05    |
| Oasl2         | 1.417615797 | 4.86E-12    |
| Ifit1         | 1.415174719 | 1.73E-10    |
| Gm10101       | 1.412533002 | 7.21E-06    |
| As3mt         | 1.410049308 | 9.29E-23    |
| Enpp1         | 1.409944765 | 8.53E-14    |
| Rapgef4       | 1.406397626 | 0.00109676  |
| 2310047M10Rik | 1.40602179  | 8.08E-09    |
| Gm4951        | 1.400262883 | 0.000115383 |
| Tspan33       | 1.399861669 | 1.55E-05    |

|               |             |             |
|---------------|-------------|-------------|
| Rtn1          | 1.39387106  | 7.92E-06    |
| B230317F23Rik | 1.391831553 | 9.27E-05    |
| Abhd3         | 1.390099959 | 3.71E-05    |
| Aldh1b1       | 1.384998376 | 0.002730149 |
| Slamf7        | 1.377927785 | 0.001591854 |
| Fndc4         | 1.36985831  | 3.43E-05    |
| Coro1a        | 1.369765102 | 0.001637551 |
| Cenf          | 1.359591242 | 0.002471529 |
| Cdk15         | 1.358451559 | 6.97E-09    |
| 1700112E06Rik | 1.356646849 | 1.53E-08    |
| C230052I12Rik | 1.355900582 | 0.001216662 |
| Unc5c         | 1.354907771 | 0.00114732  |
| Mpeg1         | 1.354378232 | 8.59E-10    |
| Igf2          | 1.349424174 | 4.46E-20    |
| Gm15824       | 1.344340237 | 0.000883822 |
| Whrn          | 1.343061275 | 0.001121494 |
| Mttp          | 1.341125028 | 0.000505312 |
| Tap1          | 1.340893416 | 3.42E-07    |
| Unc5a         | 1.340158722 | 9.87E-08    |
| Mrm1          | 1.339179366 | 5.73E-07    |
| Snx7          | 1.335591345 | 1.83E-12    |
| Ifi44         | 1.332933778 | 8.09E-07    |
| Ccnd1         | 1.332798462 | 8.11E-09    |
| Akr1c14       | 1.332311475 | 0.001542364 |
| Cnr2          | 1.32877978  | 0.000876599 |
| Efs           | 1.325064802 | 4.18E-06    |
| Cyp4v3        | 1.324100861 | 0.000781253 |
| N4bp2         | 1.316710855 | 2.51E-18    |
| AB124611      | 1.315024602 | 0.000537704 |

|               |             |             |
|---------------|-------------|-------------|
| Adra1a        | 1.310715472 | 7.38E-10    |
| Slc16a7       | 1.310624611 | 4.86E-05    |
| Chsy3         | 1.305393026 | 0.000474228 |
| Asl           | 1.304786436 | 0.000862486 |
| Fam189b       | 1.301784996 | 1.49E-06    |
| Ormdl1        | 1.29866321  | 2.32E-11    |
| Isg15         | 1.297319698 | 0.000313153 |
| Greb1         | 1.295337506 | 0.002009002 |
| Btbd11        | 1.290429839 | 4.95E-07    |
| Rasgef1b      | 1.290151156 | 5.12E-05    |
| Oasl1         | 1.288201899 | 0.001840274 |
| Evl           | 1.287802961 | 3.96E-09    |
| Tbc1d1        | 1.283447893 | 2.23E-06    |
| Slc2a9        | 1.279270785 | 0.000446616 |
| Trf           | 1.277990628 | 0.000301258 |
| Chodl         | 1.27260348  | 1.08E-08    |
| Fmo5          | 1.270837265 | 0.000138054 |
| Bmp2          | 1.264004348 | 3.63E-06    |
| Anln          | 1.263218432 | 2.09E-11    |
| RP23-121M13.4 | 1.261547164 | 0.0005635   |
| Rab11fip1     | 1.257284427 | 0.001285373 |
| Abi2          | 1.251864058 | 5.59E-32    |
| Cage1         | 1.250012731 | 0.001376908 |
| Rad18         | 1.248570715 | 2.71E-09    |
| mt-Tm         | 1.246596058 | 0.000725559 |
| Ifit3b        | 1.234442879 | 0.000487696 |
| Prkec         | 1.230521172 | 2.77E-06    |
| Cyp2u1        | 1.227019546 | 1.65E-06    |
| Slc4a7        | 1.222622903 | 3.59E-25    |

|               |             |             |
|---------------|-------------|-------------|
| Polr3g        | 1.219328893 | 1.78E-06    |
| Morc4         | 1.217182196 | 5.35E-12    |
| Ifit3         | 1.214067817 | 4.01E-08    |
| Hbegf         | 1.20622572  | 8.40E-08    |
| Dpy19l1       | 1.196572817 | 2.71E-19    |
| Adgre4        | 1.191869179 | 0.00312449  |
| Mblac2        | 1.190499617 | 2.38E-06    |
| Pole          | 1.188861346 | 1.05E-10    |
| Mppe1         | 1.188521856 | 1.82E-06    |
| 2310030G06Rik | 1.187586526 | 7.98E-06    |
| Gdap1         | 1.184629787 | 5.40E-05    |
| Naprt         | 1.181639625 | 3.22E-05    |
| Ankrd1        | 1.178684077 | 0.000489323 |
| Prox2         | 1.178649642 | 3.23E-05    |
| Rtp4          | 1.176338927 | 3.75E-07    |
| Gpld1         | 1.173335813 | 1.68E-06    |
| Ezr           | 1.171914278 | 1.90E-05    |
| Fam78b        | 1.171084149 | 3.73E-05    |
| Gm15676       | 1.163129788 | 0.0003199   |
| Pla2g2d       | 1.161841901 | 0.002088856 |
| Msc           | 1.160224979 | 1.61E-05    |
| Med12l        | 1.156986927 | 0.001200454 |
| Mx2           | 1.15626694  | 0.000677383 |
| Shkbp1        | 1.151374552 | 0.000154237 |
| Abtb2         | 1.150446723 | 1.23E-05    |
| Ilvbl         | 1.145934271 | 9.82E-07    |
| Slfn2         | 1.145724588 | 4.44E-06    |
| Vtn           | 1.143470719 | 0.000486068 |
| Siglec1       | 1.140399522 | 1.15E-09    |

|               |             |             |
|---------------|-------------|-------------|
| Cd1d1         | 1.131232023 | 0.003131023 |
| H2afx         | 1.129611988 | 2.72E-05    |
| Sord          | 1.124121808 | 4.38E-11    |
| Galm          | 1.119625297 | 7.02E-07    |
| RP23-339I6.1  | 1.116799709 | 0.001953229 |
| Rbpms2        | 1.109162565 | 0.000426243 |
| Wdfy4         | 1.108492604 | 1.94E-05    |
| Lurap11       | 1.106745084 | 8.82E-08    |
| Ostn          | 1.105653316 | 0.000537362 |
| 2010320M18Rik | 1.104507557 | 1.49E-07    |
| Zpr1          | 1.098044145 | 2.04E-08    |
| Chst3         | 1.091801331 | 0.00120019  |
| Acad12        | 1.090794519 | 2.18E-07    |
| Ttc9          | 1.089006279 | 0.000152785 |
| Arhgap27      | 1.086876142 | 2.30E-07    |
| Tmem205       | 1.086338328 | 1.79E-07    |
| Ddb2          | 1.073661857 | 1.25E-05    |
| Glis3         | 1.073601288 | 3.21E-05    |
| Cxcl9         | 1.071565924 | 0.001301584 |
| 4930458D05Rik | 1.070661226 | 2.10E-05    |
| B4galt2       | 1.065895337 | 0.000470144 |
| Oas1b         | 1.063661721 | 0.000769426 |
| Crfl1         | 1.063167035 | 0.000140133 |
| Nudt8         | 1.058170587 | 7.59E-06    |
| Tex30         | 1.057537831 | 1.21E-05    |
| Gm20632       | 1.048025909 | 0.000754903 |
| Gbp3          | 1.042151917 | 0.000268623 |
| Alox12        | 1.040878972 | 0.001238165 |
| Itgb7         | 1.040038149 | 0.001340478 |

|         |             |             |
|---------|-------------|-------------|
| Stau2   | 1.038365005 | 1.02E-12    |
| Fam132b | 1.034068619 | 0.000869191 |
| Kbtbd11 | 1.02885899  | 0.000638177 |
| Pik3ap1 | 1.028789336 | 7.30E-06    |
| Gm22154 | 1.027811039 | 0.001415314 |
| Rad9a   | 1.027169799 | 0.000365173 |
| Sdc1    | 1.023667123 | 0.000142664 |
| Trim66  | 1.020863169 | 0.002855885 |
| Bnc2    | 1.017028007 | 1.03E-06    |
| Lpin2   | 1.01567321  | 0.001061122 |
| Fgfr4   | 1.012464338 | 0.000124522 |
| Mtbp    | 1.012272218 | 0.001289363 |
| Ptgr1   | 1.008842272 | 3.39E-06    |
| Mx1     | 1.001525126 | 0.002180931 |
| Trpv2   | 0.999604894 | 5.00E-05    |
| Stk17b  | 0.996805656 | 9.37E-07    |
| Ighm    | 0.995880074 | 0.001643409 |
| Rap2a   | 0.994035234 | 5.03E-13    |
| Usp18   | 0.992760667 | 1.42E-05    |
| Chml    | 0.988982122 | 8.29E-07    |
| Msh6    | 0.983929646 | 3.14E-15    |
| H2-DMa  | 0.982933985 | 0.000290124 |
| Slfn8   | 0.981108497 | 0.000694386 |
| Fbxo44  | 0.98010499  | 1.44E-06    |
| Map2    | 0.979394312 | 7.20E-06    |
| H2-Eb1  | 0.97769625  | 4.35E-06    |
| Arl2    | 0.976570717 | 5.85E-06    |
| Tbcd    | 0.972459233 | 1.30E-07    |
| Hgf     | 0.969875662 | 0.002431561 |

|          |             |             |
|----------|-------------|-------------|
| Bst2     | 0.969749463 | 4.69E-05    |
| Rab27b   | 0.969539865 | 0.002618017 |
| H2-Q4    | 0.964198352 | 3.75E-05    |
| Polq     | 0.960715628 | 0.003159566 |
| Rnf213   | 0.956490729 | 2.10E-10    |
| Rab27a   | 0.953408429 | 5.07E-05    |
| Vcam1    | 0.95129109  | 7.20E-06    |
| Trpm2    | 0.946939973 | 0.002990218 |
| C3       | 0.945867301 | 0.000667498 |
| Cox11    | 0.944865496 | 0.000752147 |
| Ctss     | 0.934851626 | 0.001129471 |
| Gm20743  | 0.931430144 | 0.000857373 |
| Lgals3bp | 0.92999759  | 4.47E-07    |
| Pax7     | 0.929556076 | 9.22E-06    |
| Shroom2  | 0.927904012 | 8.20E-06    |
| Hook1    | 0.927607314 | 2.50E-06    |
| H2-Aa    | 0.924326164 | 7.20E-05    |
| Marveld1 | 0.921664395 | 7.19E-05    |
| Cenpo    | 0.920975983 | 3.51E-05    |
| Hrasls   | 0.918560592 | 8.40E-08    |
| Shb      | 0.915845575 | 9.22E-05    |
| Ccne2    | 0.915632466 | 5.70E-06    |
| Rnaseh2c | 0.915228071 | 0.000793459 |
| Frrs1    | 0.91048575  | 7.17E-06    |
| Prr5     | 0.909621734 | 0.000222039 |
| Primpol  | 0.909193012 | 6.95E-05    |
| Myo1g    | 0.909081342 | 0.000479938 |
| Irgm2    | 0.903685354 | 7.91E-05    |
| Gmn      | 0.903277289 | 0.001105337 |

|          |             |             |
|----------|-------------|-------------|
| Decr2    | 0.902634782 | 0.000158953 |
| Hn1l     | 0.898549601 | 2.73E-05    |
| Cadps2   | 0.89818311  | 0.002807804 |
| Tmem229b | 0.896411653 | 0.000130054 |
| Ube2t    | 0.895255694 | 0.000123871 |
| Slc22a3  | 0.89474188  | 0.001827584 |
| Limd2    | 0.894571028 | 0.001102487 |
| Plcg2    | 0.888762059 | 0.000593821 |
| Sh2d4a   | 0.888368603 | 8.32E-05    |
| Nagk     | 0.888086643 | 7.09E-06    |
| Cd74     | 0.88547699  | 3.54E-05    |
| Ccbe1    | 0.885254419 | 7.26E-05    |
| Herc6    | 0.884184076 | 0.000195792 |
| Endog    | 0.883204555 | 0.000746783 |
| Rab3ip   | 0.878351558 | 7.23E-08    |
| Pde8a    | 0.870266194 | 9.63E-08    |
| Bend7    | 0.870265062 | 0.00022481  |
| Cbx4     | 0.867418599 | 0.001225438 |
| Heyl     | 0.866351204 | 0.000349541 |
| Parm1    | 0.865089592 | 0.000375361 |
| Ciart    | 0.859441266 | 0.001180539 |
| Ddx60    | 0.843862494 | 4.48E-06    |
| Xaf1     | 0.841364077 | 0.000112367 |
| Cd24a    | 0.84029796  | 1.98E-05    |
| Gm21955  | 0.840155379 | 0.001350894 |
| H2-Ab1   | 0.837744268 | 1.33E-05    |
| Cby1     | 0.836036373 | 0.000726658 |
| Gbp2     | 0.835942461 | 0.00319892  |
| Ankrd6   | 0.828801921 | 0.001246213 |



|          |             |             |
|----------|-------------|-------------|
| Stat2    | 0.826218074 | 0.000217499 |
| Psmb8    | 0.82570505  | 0.000995218 |
| Vopp1    | 0.82231501  | 3.01E-05    |
| Golim4   | 0.821155647 | 1.37E-07    |
| Tlcd2    | 0.820926193 | 0.0014818   |
| Itgb2    | 0.82075397  | 0.001169143 |
| Fam65b   | 0.820334346 | 0.000493739 |
| Gpx1     | 0.817722258 | 5.86E-07    |
| Hjurp    | 0.816388984 | 2.52E-11    |
| Slc47a1  | 0.815960472 | 1.09E-06    |
| H2-T23   | 0.811488912 | 2.83E-05    |
| Vps13a   | 0.809946882 | 1.16E-05    |
| Rsad2    | 0.809602289 | 1.90E-05    |
| Syt12    | 0.807388439 | 0.001746076 |
| Lgals9   | 0.806940301 | 2.94E-05    |
| Lcp1     | 0.806211004 | 0.001071892 |
| Parp12   | 0.805989267 | 2.34E-08    |
| Pcx      | 0.805727582 | 0.000366012 |
| Psmb10   | 0.805646928 | 8.60E-05    |
| Soat1    | 0.804865854 | 4.13E-08    |
| Tspan4   | 0.801685309 | 0.000287475 |
| BC017158 | 0.79721103  | 0.000195643 |
| Cyp39a1  | 0.795578442 | 0.000635957 |
| Hsd11b1  | 0.794974884 | 1.24E-05    |
| Plin2    | 0.793789094 | 1.58E-05    |
| Fkrp     | 0.793575194 | 1.00E-05    |
| Mpv17l   | 0.793404604 | 0.001290245 |
| Acot7    | 0.79080824  | 0.002276537 |
| Agpat2   | 0.790455049 | 0.002041369 |

|               |             |             |
|---------------|-------------|-------------|
| H2-K1         | 0.782610699 | 0.000156397 |
| Yif1b         | 0.781901627 | 0.00036247  |
| Cgrrf1        | 0.781230446 | 4.62E-08    |
| Tmem206       | 0.777071599 | 0.000875627 |
| Mcm6          | 0.776973288 | 0.000146551 |
| Mesdc1        | 0.774983829 | 1.56E-05    |
| Hoxa10        | 0.774392376 | 7.94E-06    |
| Adar          | 0.7742661   | 5.08E-07    |
| Gxylt2        | 0.77260079  | 0.000122106 |
| Rpa3          | 0.772231966 | 0.000817741 |
| Dnajc12       | 0.770284962 | 9.61E-06    |
| Eva1b         | 0.767633728 | 0.00267247  |
| Lysmd2        | 0.762552101 | 1.71E-05    |
| Blmh          | 0.762457917 | 1.59E-13    |
| Pde1c         | 0.758961481 | 0.000523088 |
| Hsd17b12      | 0.757949625 | 0.002300362 |
| H2-T24        | 0.75652047  | 3.09E-05    |
| A830052D11Rik | 0.755052367 | 0.003206023 |
| Laptm5        | 0.751211738 | 0.001076957 |
| Lym2          | 0.747219114 | 2.72E-07    |
| Wls           | 0.74509067  | 4.25E-11    |
| Dtx3l         | 0.743216169 | 1.24E-07    |
| Rhpn2         | 0.743207877 | 0.001967764 |
| Parp16        | 0.741519194 | 0.001339885 |
| Qsox1         | 0.741406615 | 4.42E-05    |
| B2m           | 0.741301891 | 0.000165556 |
| 2310011J03Rik | 0.740328161 | 5.93E-05    |
| Ap1s1         | 0.7385464   | 1.33E-05    |
| Zfp61         | 0.734745799 | 0.002440196 |

|            |             |             |
|------------|-------------|-------------|
| Gm15179    | 0.728562978 | 0.001699206 |
| Uba7       | 0.726950437 | 0.000258939 |
| Ly6e       | 0.725536315 | 6.68E-06    |
| Slc9a3r1   | 0.723288266 | 0.001044921 |
| Gkap1      | 0.720125934 | 1.71E-09    |
| Fads3      | 0.719572165 | 0.00301312  |
| Ebpl       | 0.719044151 | 0.001325755 |
| Slc1a1     | 0.716823565 | 0.001807445 |
| Mettl21c   | 0.709591083 | 0.000723645 |
| Emc9       | 0.708846893 | 6.79E-05    |
| Tiam2      | 0.707906376 | 0.000895853 |
| Eif5a      | 0.704360934 | 2.43E-05    |
| Tmem120b   | 0.702119193 | 0.001474902 |
| Ifit2      | 0.696934855 | 1.16E-05    |
| Cryz       | 0.693314377 | 0.000527416 |
| Etaa1      | 0.69244106  | 0.000801969 |
| Icam1      | 0.689701954 | 0.000952249 |
| Klhl23     | 0.686934438 | 4.38E-06    |
| Cd82       | 0.683945135 | 4.62E-05    |
| D16Ert472e | 0.682378074 | 0.000768192 |
| Mapkap3    | 0.68233869  | 0.002848889 |
| Il17ra     | 0.682139458 | 0.000594631 |
| Ppp3cc     | 0.680457815 | 1.96E-05    |
| Parp14     | 0.680315915 | 2.15E-06    |
| Aim1       | 0.678994419 | 0.000469313 |
| Relt       | 0.678014854 | 0.002693015 |
| H2-D1      | 0.677974538 | 0.000281947 |
| Epb4.115   | 0.67720807  | 8.10E-06    |
| Ndn        | 0.672057229 | 0.002934389 |

|          |             |             |
|----------|-------------|-------------|
| Irgm1    | 0.666907197 | 8.27E-06    |
| Cend3    | 0.664423661 | 1.96E-05    |
| Hspa4l   | 0.659182862 | 0.000241498 |
| Tspan9   | 0.658519196 | 0.002530279 |
| Stat1    | 0.656449907 | 0.00190673  |
| Rom1     | 0.654300287 | 0.002873577 |
| Sec31b   | 0.652921401 | 3.39E-06    |
| Myef2    | 0.652172161 | 0.002365018 |
| Tsga10   | 0.651354945 | 0.000135134 |
| Ermp1    | 0.651269704 | 2.14E-08    |
| Irf9     | 0.651119536 | 7.88E-06    |
| Spats2   | 0.650808548 | 0.000270422 |
| Pms1     | 0.650541568 | 0.000198584 |
| Slc46a3  | 0.646705739 | 0.000134425 |
| Lbh      | 0.645689718 | 0.002040309 |
| Gtdc1    | 0.643791805 | 7.30E-10    |
| Gas1     | 0.641418999 | 0.000295982 |
| Nxn      | 0.640195369 | 0.001475598 |
| Ifitm3   | 0.64003448  | 3.68E-05    |
| Bnip1    | 0.638885608 | 3.26E-06    |
| Galnt10  | 0.637350549 | 0.00038196  |
| Slc19a2  | 0.630003589 | 0.000181274 |
| Pxdc1    | 0.62883149  | 0.000205833 |
| Nudt19   | 0.623937002 | 9.18E-05    |
| Mdfic    | 0.621880335 | 2.91E-06    |
| Sgk3     | 0.621553873 | 2.06E-05    |
| Slc22a15 | 0.620230055 | 0.002282912 |
| Fbp2     | 0.619004099 | 0.000572868 |
| Slc16a1  | 0.616230189 | 0.00010979  |

|               |             |             |
|---------------|-------------|-------------|
| Chka          | 0.615469721 | 0.001860999 |
| Ogfod2        | 0.613740433 | 0.00126893  |
| Apobec3       | 0.609076932 | 0.002255621 |
| Traf3         | 0.605853158 | 3.08E-06    |
| Cep19         | 0.602248715 | 5.82E-05    |
| Rttm          | 0.601485811 | 0.002062556 |
| Ttc7          | 0.600056061 | 0.002502459 |
| E130308A19Rik | 0.596377664 | 0.00320904  |
| Sirt7         | 0.595682048 | 0.000790394 |
| Serpinb6a     | 0.595244001 | 0.000629335 |
| Crot          | 0.59331483  | 0.000838577 |
| Pdxk          | 0.592150984 | 0.000974676 |
| Ttc39b        | 0.587664337 | 0.000471295 |
| Tomm22        | 0.585581772 | 0.000438557 |
| Alg9          | 0.585099941 | 0.00072145  |
| Rps16         | 0.585025373 | 0.002693848 |
| Dennd5b       | 0.584095361 | 0.000622633 |
| Adamts10      | 0.583141068 | 5.59E-05    |
| Ddx58         | 0.582662666 | 4.79E-05    |
| Erlin2        | 0.582642482 | 2.35E-05    |
| Helz2         | 0.581647259 | 8.55E-05    |
| Bola1         | 0.579938629 | 0.002192991 |
| Apeh          | 0.577387259 | 0.001103294 |
| Nudt18        | 0.575195558 | 0.002145572 |
| Gabbr1        | 0.573851386 | 3.10E-05    |
| Lmbr11        | 0.573456172 | 0.00023563  |
| Ifnar2        | 0.571081196 | 0.001165004 |
| Ly6a          | 0.568755792 | 0.002595064 |
| Rap1gap2      | 0.568416135 | 0.00069188  |

|          |             |             |
|----------|-------------|-------------|
| Csk      | 0.563469829 | 0.001718197 |
| Neat1    | 0.562725198 | 0.00319086  |
| Reep1    | 0.562519765 | 0.000456308 |
| Hmgcr    | 0.561943375 | 3.93E-05    |
| Ppapdc1b | 0.561777778 | 0.002460113 |
| Ucp2     | 0.561029772 | 0.00151231  |
| Lrp4     | 0.55915994  | 3.82E-05    |
| Slbp     | 0.558145775 | 0.000736171 |
| Smim19   | 0.551564892 | 0.001528078 |
| Mfhas1   | 0.550344792 | 0.002413248 |
| Dtx4     | 0.546411032 | 4.00E-06    |
| Slc39a10 | 0.546312787 | 0.000198833 |
| Aph1b    | 0.545622485 | 0.002878949 |
| Tdrp     | 0.545480067 | 0.002290644 |
| Plekha2  | 0.543944384 | 0.000233375 |
| Cmpk2    | 0.54115057  | 0.002634897 |
| Dock8    | 0.539007812 | 0.000527912 |
| Foxp2    | 0.532726114 | 0.000292321 |
| Setd6    | 0.528608127 | 0.00051544  |
| Acbd4    | 0.524965228 | 0.001585069 |
| Skil     | 0.524681307 | 0.000180044 |
| Unc93b1  | 0.520740945 | 0.002491259 |
| Cutc     | 0.518851063 | 1.88E-05    |
| Gramd3   | 0.518217126 | 0.001863474 |
| Trim30a  | 0.51564543  | 0.000510628 |
| Acyp1    | 0.511694677 | 0.000659025 |
| Prex1    | 0.509860643 | 0.000861201 |
| Aktip    | 0.502212687 | 3.53E-07    |
| Trim37   | 0.50188207  | 0.000350261 |

|               |             |             |
|---------------|-------------|-------------|
| P4hb          | 0.498918667 | 0.001669721 |
| Ndufb5        | 0.496179462 | 0.001864255 |
| Psme1         | 0.49606566  | 0.003287225 |
| Zc3hav1       | 0.491463483 | 0.000107104 |
| Hfe           | 0.489981108 | 0.001744762 |
| Aldh3a2       | 0.489900168 | 0.000781932 |
| Slc25a19      | 0.487185294 | 0.00301787  |
| Vipas39       | 0.475770585 | 0.000423815 |
| Adgrl2        | 0.475461818 | 0.000220954 |
| Psme2         | 0.467595995 | 0.002729122 |
| Fam20b        | 0.465314306 | 7.94E-05    |
| Nras          | 0.462820465 | 0.000259926 |
| Dynlrb1       | 0.450400322 | 0.001849736 |
| Ifih1         | 0.448793948 | 0.002120973 |
| Sirpa         | 0.447408557 | 0.002843344 |
| Zmym6         | 0.446169984 | 0.001175373 |
| Prnp          | 0.441337004 | 0.002111911 |
| Pon3          | 0.436799045 | 0.00038992  |
| Sfmbt1        | 0.432683769 | 0.001149111 |
| Atrnl1        | 0.423563729 | 0.000345912 |
| mt-Ts1        | 0.420374484 | 0.003277338 |
| 1600014C10Rik | 0.413595895 | 0.002794725 |
| Tpd5211       | 0.413370196 | 0.003075305 |
| 2210015D19Rik | 0.406229221 | 0.000364908 |
| Vps16         | 0.400101167 | 0.002091881 |
| Rest          | 0.373121653 | 0.002819555 |
| Itsn1         | 0.357675805 | 0.00019172  |
| Mknk1         | 0.357049361 | 0.003019981 |
| Sdc2          | 0.344091896 | 0.0022336   |

|               |              |             |
|---------------|--------------|-------------|
| Hdlbp         | 0.338557341  | 0.000952116 |
| Dock1         | 0.322844005  | 0.000587668 |
| 1500011K16Rik | 0.311765957  | 0.001739674 |
| Senp2         | 0.302319539  | 0.001973416 |
| Zfp266        | -0.23883667  | 0.002940485 |
| Cdc42         | -0.259224845 | 0.002889497 |
| Kat6b         | -0.277099292 | 0.000906307 |
| Ubp1          | -0.284673522 | 0.000998887 |
| Sugt1         | -0.291027059 | 0.00150033  |
| Hbp1          | -0.294946462 | 0.002557857 |
| Chd4          | -0.296679225 | 0.001656076 |
| Tspyl1        | -0.298190966 | 0.002320387 |
| Mapk9         | -0.302009366 | 0.003259574 |
| Prkrir        | -0.302083469 | 0.000227696 |
| Abcc9         | -0.303464895 | 0.002929945 |
| Cstf2t        | -0.303495082 | 0.001654387 |
| Arl2bp        | -0.303873823 | 0.001279423 |
| Armc8         | -0.305931525 | 0.002369282 |
| Sfswap        | -0.306419318 | 0.001314984 |
| Klhl24        | -0.307423593 | 0.002678543 |
| Man2a2        | -0.313082825 | 0.002296176 |
| Eif4b         | -0.315135439 | 6.87E-05    |
| Bzw2          | -0.317012971 | 0.0013996   |
| Pitrm1        | -0.324107939 | 0.000757951 |
| Nol7          | -0.324289203 | 0.002567071 |
| Phactr2       | -0.324625833 | 0.001755663 |
| Ybx1          | -0.325675233 | 8.10E-05    |
| Sort1         | -0.329664801 | 0.001601181 |
| Usp53         | -0.330230088 | 0.003266129 |



|               |              |             |
|---------------|--------------|-------------|
| Uap1          | -0.331057172 | 0.000924267 |
| Trappc8       | -0.331084708 | 0.002161864 |
| B230219D22Rik | -0.331450481 | 0.003140943 |
| Pcmdt2        | -0.333878238 | 0.00204098  |
| Atp11a        | -0.335731547 | 0.000289768 |
| Mrps9         | -0.336102383 | 0.001534751 |
| Tshz1         | -0.33704371  | 0.002282086 |
| Zbtb18        | -0.339828916 | 0.002857649 |
| Hp1bp3        | -0.345423056 | 0.002015335 |
| Slc6a6        | -0.346495736 | 1.17E-05    |
| Stox2         | -0.346942116 | 0.002882274 |
| Reep5         | -0.349936616 | 0.003160723 |
| Stard7        | -0.352751287 | 6.51E-05    |
| Nphp1         | -0.352950691 | 0.002599721 |
| Eif4enif1     | -0.354859599 | 0.003183668 |
| Tmem38b       | -0.356731849 | 0.001857041 |
| Yy1           | -0.357557852 | 0.00057744  |
| Jph1          | -0.361073228 | 0.001652523 |
| Dnaja2        | -0.362487308 | 0.000645855 |
| Slmap         | -0.364016607 | 0.003291145 |
| Spryd7        | -0.366401291 | 0.001762585 |
| Picalm        | -0.366675407 | 0.001550781 |
| Atf6          | -0.368415032 | 0.000259895 |
| Zfp317        | -0.36920577  | 0.00243981  |
| Eif2s3x       | -0.370074935 | 0.000249855 |
| Irak1         | -0.373693765 | 0.000306831 |
| Ice1          | -0.374055038 | 0.000667883 |
| Agtppb1       | -0.374151357 | 0.002616017 |
| L2hgdh        | -0.374466602 | 0.001451535 |

|               |              |             |
|---------------|--------------|-------------|
| Zfp9          | -0.376410819 | 0.00205126  |
| Fundc2        | -0.376570244 | 0.000377224 |
| Rprd2         | -0.378910936 | 0.001962258 |
| Naa35         | -0.379062706 | 0.002430748 |
| Nbn           | -0.379515105 | 0.002302548 |
| Tdrd3         | -0.383297307 | 0.000878538 |
| Otud7b        | -0.383416827 | 0.000383117 |
| Pus7          | -0.385776785 | 0.00188002  |
| B230354K17Rik | -0.394244182 | 0.000603897 |
| Rpa1          | -0.397838696 | 0.000452958 |
| Sfr1          | -0.398332927 | 0.000861921 |
| Gid4          | -0.39846882  | 0.00112454  |
| Ets2          | -0.399544044 | 0.001446779 |
| Myom1         | -0.399631449 | 4.62E-06    |
| Tmem186       | -0.401537154 | 0.00092047  |
| Atp1a2        | -0.40244091  | 0.003269103 |
| Slc8a3        | -0.405744035 | 0.0002462   |
| Rexo2         | -0.406211681 | 0.000330368 |
| Mnat1         | -0.406616975 | 0.001975122 |
| Hipk3         | -0.407687481 | 0.000291856 |
| Rab12         | -0.408562015 | 0.002573059 |
| Sh3glb1       | -0.408699603 | 2.27E-05    |
| Eif4g2        | -0.409654459 | 1.45E-06    |
| Capn3         | -0.410226772 | 0.001129767 |
| 11-Sep        | -0.410633621 | 0.000269474 |
| Gramd1b       | -0.412415693 | 0.001708879 |
| Nolc1         | -0.412585379 | 0.00059476  |
| Nrd1          | -0.415209529 | 0.000567472 |
| Usp31         | -0.417965047 | 0.000745054 |

|               |              |             |
|---------------|--------------|-------------|
| Uald2         | -0.418974529 | 0.002184555 |
| Cped1         | -0.419642823 | 3.08E-07    |
| Mfsd8         | -0.421536774 | 0.000958429 |
| Sdad1         | -0.421661588 | 0.002535466 |
| Hrc           | -0.422795068 | 0.000119036 |
| Mapk8         | -0.423030222 | 0.000123346 |
| Osgp          | -0.423078408 | 0.001201454 |
| Mapk1ip1      | -0.425225809 | 0.001187097 |
| Tbc1d4        | -0.427021931 | 0.000210788 |
| Tmem87a       | -0.427705322 | 0.001126026 |
| Rlf           | -0.429728673 | 0.000342744 |
| Pdha1         | -0.431799806 | 3.89E-06    |
| Cldnd1        | -0.432763111 | 0.002714011 |
| Zfp422        | -0.434871414 | 0.001424631 |
| Myo18b        | -0.439548809 | 0.000193956 |
| 1700025G04Rik | -0.440332546 | 0.001216649 |
| Snx9          | -0.44136088  | 4.73E-05    |
| Zfand5        | -0.441490536 | 0.000340696 |
| Vezf1         | -0.441949639 | 0.000145562 |
| Txndc16       | -0.443792179 | 0.000124583 |
| Scrn3         | -0.444493593 | 0.001385489 |
| Cpe           | -0.444976934 | 0.002356675 |
| Mybpc2        | -0.445460393 | 0.001796897 |
| Murc          | -0.446262911 | 1.67E-05    |
| Gm7292        | -0.44824438  | 1.80E-05    |
| Ankrd11       | -0.449019005 | 0.001004663 |
| Sucla2        | -0.451646209 | 0.0031118   |
| Zfp652        | -0.454036424 | 0.002170406 |
| Bicd2         | -0.454206929 | 2.49E-05    |

|               |              |             |
|---------------|--------------|-------------|
| Tfdp1         | -0.454489042 | 0.000917234 |
| Psm6          | -0.46542319  | 5.09E-05    |
| Slc40a1       | -0.466833242 | 0.001078535 |
| Hmgb1         | -0.467847762 | 0.003113457 |
| Art3          | -0.468998483 | 5.98E-08    |
| Thumpd1       | -0.469756909 | 0.000353652 |
| R3hdm2        | -0.474973387 | 0.002868409 |
| Cc2d1b        | -0.475867815 | 0.002348347 |
| Fgfr1         | -0.477787835 | 0.003040699 |
| Rpl23         | -0.47867336  | 0.001064285 |
| Cecr2         | -0.479017184 | 3.57E-05    |
| Pat1          | -0.479818346 | 0.000565785 |
| Capn7         | -0.480062823 | 0.00144011  |
| Gm9821        | -0.480084514 | 0.000582042 |
| Phtf2         | -0.480581667 | 0.001489634 |
| Ddx21         | -0.482315693 | 0.001351466 |
| Ndc1          | -0.483863088 | 0.000877901 |
| Hip1          | -0.486126564 | 6.76E-07    |
| Atp5l         | -0.493690453 | 1.70E-05    |
| Atcayos       | -0.494708529 | 0.002035783 |
| H1f0          | -0.496590926 | 4.56E-08    |
| Dnajc21       | -0.497458976 | 0.000813899 |
| Etl4          | -0.498969898 | 0.000173644 |
| Fam63a        | -0.499208647 | 0.001954924 |
| Ncte1         | -0.499369252 | 2.45E-06    |
| Usp45         | -0.499498169 | 0.000615239 |
| 5730409E04Rik | -0.500316304 | 0.00012807  |
| Eif3j1        | -0.500512433 | 0.001247707 |
| Fut10         | -0.502954335 | 0.000794516 |

|               |              |             |
|---------------|--------------|-------------|
| Fam185a       | -0.503350614 | 0.000481096 |
| 4931406P16Rik | -0.503736253 | 2.18E-05    |
| Zfyve1        | -0.504764685 | 0.001163306 |
| Kifap3        | -0.505509987 | 2.39E-05    |
| Slc12a2       | -0.510564664 | 0.001347703 |
| Fam210a       | -0.511133321 | 1.20E-06    |
| Prepl         | -0.513348794 | 0.001772354 |
| Txlnb         | -0.518716922 | 4.74E-08    |
| Prkab2        | -0.519067657 | 0.0014171   |
| Vezt          | -0.520627117 | 0.000213367 |
| Pcnt          | -0.524752647 | 3.27E-08    |
| Leo1          | -0.529763731 | 0.000755145 |
| Dnal1         | -0.539524965 | 0.001331004 |
| Tsen2         | -0.542440332 | 0.001619428 |
| Aaed1         | -0.545188101 | 0.000725972 |
| Zfp1          | -0.546654128 | 0.000475679 |
| Mrps33        | -0.549799916 | 2.69E-05    |
| Nfx1          | -0.549947683 | 1.20E-08    |
| Tbcel         | -0.550123586 | 1.81E-07    |
| Ap1ar         | -0.550409764 | 2.40E-05    |
| Mllt3         | -0.551252275 | 0.000331205 |
| Tor1aip1      | -0.553562023 | 3.16E-06    |
| Dpf3          | -0.554820469 | 1.35E-05    |
| Zfp112        | -0.557537489 | 0.001240103 |
| Gm2830        | -0.557700994 | 2.04E-05    |
| Slc30a4       | -0.563909019 | 1.95E-06    |
| Art5          | -0.564476568 | 0.000299834 |
| Msh3          | -0.564488823 | 0.001123861 |
| Myo5c         | -0.565901809 | 8.93E-05    |

|               |              |             |
|---------------|--------------|-------------|
| Ssx2ip        | -0.566162404 | 1.84E-05    |
| Clpx          | -0.576136648 | 4.81E-06    |
| Zak           | -0.576776737 | 1.93E-08    |
| Snhg5         | -0.578071005 | 0.000923552 |
| Axin2         | -0.58200642  | 0.002997986 |
| Gadd45b       | -0.583984919 | 0.000101658 |
| Snhg6         | -0.585327687 | 0.000435441 |
| Rilp11        | -0.591193861 | 0.000372171 |
| Zfp229        | -0.591744975 | 0.00272286  |
| Mettl7a1      | -0.597090309 | 0.000567958 |
| Usp20         | -0.603906941 | 0.002061931 |
| Atg12         | -0.607851283 | 5.25E-06    |
| Atp2c1        | -0.611321    | 1.49E-06    |
| Ndufa13       | -0.611696951 | 1.04E-05    |
| 2900097C17Rik | -0.611968942 | 8.91E-06    |
| Gm561         | -0.613139192 | 2.83E-05    |
| Naca          | -0.615931615 | 0.00192111  |
| RP24-470E5.4  | -0.616044918 | 0.002695184 |
| Gnl3l         | -0.61605319  | 4.84E-09    |
| Ctage5        | -0.618337199 | 0.000351785 |
| Nav2          | -0.620654098 | 0.001773803 |
| Slc26a6       | -0.62078393  | 0.002398747 |
| Akap9         | -0.624227542 | 0.002476947 |
| Ddo           | -0.628531208 | 4.36E-07    |
| Cep85         | -0.646852219 | 4.81E-08    |
| Znhit6        | -0.651343965 | 0.000751075 |
| Atp1b2        | -0.651447981 | 0.000435822 |
| Sorl1         | -0.652612432 | 7.57E-06    |
| Gm12439       | -0.660735581 | 0.002766149 |

|               |              |             |
|---------------|--------------|-------------|
| Phc1          | -0.666517776 | 0.001191282 |
| Lsm11         | -0.668146343 | 0.001541978 |
| Asb11         | -0.669921541 | 0.00013608  |
| RP24-140K12.4 | -0.671675543 | 0.002798015 |
| Pcgf3         | -0.674869362 | 4.61E-08    |
| Abcb8         | -0.68279899  | 0.000124065 |
| Fam131a       | -0.684221037 | 0.000426216 |
| Ift57         | -0.685473388 | 0.002399304 |
| Col24a1       | -0.690339145 | 0.002545782 |
| Fzd7          | -0.690679222 | 0.00115819  |
| Lym9          | -0.694660168 | 0.000910952 |
| Gatsl2        | -0.696823229 | 0.000224456 |
| Ccdc130       | -0.70135361  | 0.003142199 |
| Neu2          | -0.702432611 | 0.001579025 |
| Zfp354a       | -0.714486447 | 0.00033881  |
| Klhl31        | -0.715618279 | 4.46E-07    |
| Nampt         | -0.721655171 | 6.85E-14    |
| Ppp1r27       | -0.722150368 | 0.002306963 |
| Slc37a4       | -0.722645158 | 9.28E-06    |
| Dbi           | -0.723988475 | 2.71E-05    |
| Eif4g3        | -0.728393784 | 7.52E-07    |
| Asph          | -0.745467932 | 9.80E-08    |
| Minpp1        | -0.746145184 | 2.45E-08    |
| Ttl7          | -0.752425223 | 1.29E-06    |
| Pygo1         | -0.754950301 | 1.04E-08    |
| Gm904         | -0.755519467 | 0.002411484 |
| Ranbp1        | -0.757987872 | 2.42E-06    |
| BC024978      | -0.762676065 | 0.001443246 |
| Map10         | -0.769109608 | 0.000102911 |

|               |              |             |
|---------------|--------------|-------------|
| Zfp712        | -0.771343172 | 0.000975561 |
| Tigd4         | -0.771673583 | 0.002174424 |
| RP23-181C16.4 | -0.781830804 | 0.000132398 |
| Ift74         | -0.805811206 | 3.78E-07    |
| Tceal8        | -0.819170401 | 5.38E-05    |
| Pnpla3        | -0.825935156 | 0.001546539 |
| Svip          | -0.836842503 | 8.89E-05    |
| Hnmt          | -0.838839145 | 0.001138613 |
| Asb4          | -0.841073702 | 6.26E-06    |
| Tcea1         | -0.843400865 | 2.13E-08    |
| Pnck          | -0.853228518 | 0.002464585 |
| Psmc12        | -0.855439628 | 3.50E-14    |
| Enox2         | -0.861701604 | 0.000553487 |
| Kcnab1        | -0.875654916 | 4.00E-05    |
| 2700097O09Rik | -0.876565691 | 8.05E-06    |
| Sgcb          | -0.878844024 | 2.34E-12    |
| Rbfox1        | -0.882416727 | 1.34E-12    |
| Snhg4         | -0.88890159  | 0.000166992 |
| Ube2d1        | -0.896996909 | 5.52E-14    |
| Lmnb2         | -0.90011038  | 0.002206901 |
| Porcn         | -0.917153989 | 1.99E-05    |
| Gm15564       | -0.918718358 | 0.000897923 |
| Cep295        | -0.923859789 | 8.70E-08    |
| Cenpq         | -0.923985552 | 9.26E-05    |
| Cmya5         | -0.945641201 | 8.32E-12    |
| Sh3rf2        | -0.947320124 | 3.63E-07    |
| Asb18         | -0.949460792 | 3.90E-09    |
| Rap1gap       | -0.951518326 | 0.000434    |
| Gm15662       | -0.954393058 | 0.001169994 |



|               |              |             |
|---------------|--------------|-------------|
| 2310065F04Rik | -0.965599839 | 0.000174491 |
| Cdh4          | -0.971995583 | 0.00245737  |
| Slc43a1       | -0.972222396 | 2.39E-05    |
| Lars2         | -0.989572411 | 0.000303605 |
| Srbd1         | -1.009095044 | 4.66E-06    |
| Mphosph10     | -1.009669538 | 1.14E-09    |
| Smg5          | -1.017984908 | 1.13E-14    |
| Rn18s-rs5     | -1.020298153 | 0.000323638 |
| Bcl7b         | -1.067475544 | 9.23E-09    |
| Klhl33        | -1.08095844  | 3.04E-14    |
| Eda2r         | -1.092867331 | 9.14E-12    |
| A930018M24Rik | -1.107803309 | 4.25E-14    |
| Oacyl         | -1.120116744 | 0.002777238 |
| Cox15         | -1.165623537 | 2.14E-20    |
| Apool         | -1.181455503 | 2.47E-16    |
| Gm11613       | -1.184287972 | 4.15E-07    |
| Nutf2         | -1.192426951 | 2.54E-17    |
| Map9          | -1.214309357 | 0.002341911 |
| Gm28321       | -1.226844114 | 1.34E-06    |
| Trp63         | -1.234573928 | 5.56E-10    |
| Gm5091        | -1.252990753 | 0.003159524 |
| Nsun3         | -1.271473249 | 3.45E-08    |
| Cbr4          | -1.27571794  | 1.30E-17    |
| Asb15         | -1.299940003 | 6.19E-11    |
| Ngfr          | -1.351493239 | 7.74E-06    |
| Casr          | -1.407182982 | 9.91E-05    |
| Cdkn1c        | -1.424895701 | 3.74E-11    |
| Kcnc3         | -1.429623463 | 0.000716663 |
| Fgfbp1        | -1.430561177 | 0.003155409 |

|               |              |          |
|---------------|--------------|----------|
| 5730419F03Rik | -1.502750412 | 1.85E-07 |
| RP23-1B20.2   | -1.582903971 | 4.33E-05 |
| Hsbp111       | -1.625538299 | 6.29E-06 |
| Plin3         | -1.640260332 | 1.60E-23 |
| Calr3         | -1.657575038 | 3.13E-09 |
| Muc4          | -1.67414674  | 7.85E-05 |
| Lrp2bp        | -1.724977115 | 2.46E-09 |
| Nek3          | -1.77057771  | 6.43E-11 |
| Abca4         | -1.823570517 | 1.33E-08 |
| Ndufa1        | -1.975196768 | 4.55E-43 |
| Morn4         | -2.175664061 | 2.29E-05 |
| Stxbp4        | -2.227204758 | 2.16E-15 |
| Slc17a7       | -2.474882746 | 7.66E-05 |

---
